# Supplementary material for: Positive selective sweeps of epigenetic mutations regulating specialized metabolites in plants
Source: HighWire-hosted journal article supplement (doi:10.1101/gr.271726.120), 2021-05-18
Supplement: Supplemental_Methods.pdf [file Supplemental_Methods.pdf]

## SUPPLEMENTAL METHODS

### Estimation of demographic history of 620 accessions of *Arabidopsis thaliana*

Out of 1,397,934 SNPs in 620 accessions of *A. thaliana*, we focused on 667,277 SNPs located on the intergenic regions. To infer the demographic history in 620 *A. thaliana* accessions, we used simple five demographic models by Fastsimcoal26 program (Excoffier and Foll 2011) (Supplemental Fig. S14). Model 1 is assumed to be constant population size. Models 2 and 3 are assumed to have an event of increasing and decreasing population size, respectively. Models 4 and 5 are assumed to have an increasing event of population size after and before a decreasing event of population size, respectively. In each model, we performed Fastsimcoal26 program with the parameter ‘-n 100000 -d -M -L 500’. The mutation rate ( $\mu$ ) is defined to be  $7 \times 10^{-9}$  /bp/generation in *A. thaliana* (Ossowski et al. 2010). The likelihoods scores were compared among the five models by Akaike’s information criterion score (AIC). As a result, model 5 was selected as the best fitting model

(Supplemental Table S21). This model corresponds to the demographic history reported in previous studies (Durvasula et al. 2017; The 1001 Genomes Consortium 2016). The demographic parameters estimated in model 5 are used to generate sequences under neutral model (Supplemental Table S22).

### **Tajima's $D$ under neutral model**

To generate sequences under neutral model, we performed ms program based on demographic parameters estimated by model 5 (Hudson 2002). Under ms program, sample size, replications, segment size and mutation rates are defined to be 620, 10,000, 10kb and  $7 \times 10^{-9}$  /bp/generations.

We converted the ms format sequences to vcf format with randomly selected SNP sites. Tajima's  $D$  was calculated in the converted ms sequences 10,000 replicates by VCFtools program (Danecek et al. 2011). The Tajima's  $D$  values in the best demographic model are expected to be neutral Tajima's  $D$ .

### **Estimation of $F_{ST}$ and $ZF_{ST}$**

We divided the 620 accessions into two groups, with and without mCG.

The  $F_{ST}$  between the two groups was calculated in a 10-kb window by the VCFtools program (Danecek et al. 2011). To reduce the effect of population structure, we calculated Z-transformed  $F_{ST}$  ( $ZF_{ST}$ ) from the  $F_{ST}$  values (Axelsson et al. 2013). The  $ZF_{ST}$  is estimated using the following equation:  $ZF_{ST} = (F_{ST} - \mu F_{ST}) / \sigma F_{ST}$ . The  $\mu F_{ST}$  is the mean  $F_{ST}$ . The  $\sigma F_{ST}$  is the standard deviation. At each of selected mCGs, we calculated the  $ZF_{ST}$  in all windows. Then, we compared  $ZF_{ST}$  between windows contain selected mCG and the other windows by Wilcoxon rank sum test.

### **Detection of selective sweep by using SweeD**

To detect selective sweep in target mCGs, we used SweeD program (Pavlidis et al. 2013). In accessions with the target mCG, we calculated composite likelihood ratio (CLR) with the parameter ‘-grid 2000 -maf 0.05’. We defined a significant threshold (CLR > 1.51) from top 5% of whole genome CLR. For comparison, we also calculated CLR at any genome position in accessions

lacking the focused mCG.

## Supplemental References

- The 1001 Genomes Consortium. 2016. 1,135 Genomes Reveal the Global Pattern of Polymorphism in *Arabidopsis thaliana*. *Cell* **166**: 481–491.
- Axelsson E, Ratnakumar A, Arendt ML, Maqbool K, Webster MT, Perloski M, Liberg O, Arnemo JM, Hedhammar Å, Lindblad-Toh K. 2013. The genomic signature of dog domestication reveals adaptation to a starch-rich diet. *Nature* **495**: 360–364.
- Danecek P, Auton A, Abecasis G, Albers CA, Banks E, DePristo MA, Handsaker RE, Lunter G, Marth GT, Sherry ST, et al. 2011. The variant call format and VCFtools. *Bioinformatics* **27**: 2156–2158.
- Durvasula A, Fulgione A, Gutaker RM, Alacakaptan SI, Flood PJ, Neto C, Tsuchimatsu T, Burbano HA, Xavier Pico F, Alonso-Blanco C, et al. 2017. African genomes illuminate the early history and transition to selfing in *Arabidopsis thaliana*. *Proc Natl Acad Sci U S A* **114**: 5213–5218.
- Excoffier L, Foll M. 2011. fastsimcoal: A continuous-time coalescent simulator of genomic diversity under arbitrarily complex evolutionary scenarios. *Bioinformatics* **27**: 1332–1334.
- Hudson RR. 2002. Generating samples under a Wright-Fisher neutral model of genetic variation. *Bioinformatics* **18**: 337–338.
- Ossowski S, Schneeberger K, Lucas-Lledó JI, Warthmann N, Clark RM, Shaw RG, Weigel D, Lynch M. 2010. The rate and molecular spectrum of spontaneous mutations in *arabidopsis thaliana*. *Science (80- )* **327**: 92–94.
- Pavlidis P, Zivkovic D, Stamatakis A, Alachiotis N. 2013. SweeD: Likelihood-Based Detection of Selective Sweeps in Thousands of Genomes. *Mol Biol Evol* **30**: 2224–2234.
